# Supplementary material
Source: PubMed Central journal article supplement (PMC3488946)
Supplement: CJN.02980312_CJN02980312SupplementaryData.pdf [file CJN.02980312_CJN02980312SupplementaryData.pdf]

**Table S1.** Equations for estimating GFR

|                                      |                                                                                                                                                          |
|--------------------------------------|----------------------------------------------------------------------------------------------------------------------------------------------------------|
| eGFR <sub>cys</sub> <sup>a</sup>     | $66.8 \times \text{cystatin C}^{-1.30}$                                                                                                                  |
| eGFR <sub>MDRD</sub> <sup>b</sup>    | $175 \times S_{cr}^{-1.154} \times \text{age}^{-0.203} \times 0.742$ [if female] $\times 1.272$ [if black]                                               |
| eGFR <sub>CKD-EPI</sub> <sup>c</sup> | $141 \times \min(S_{cr}/k, 1)^{\alpha} \times \max(S_{cr}/k, 1)^{-1.209} \times 0.993^{\text{age}}$ $\times 1.018$ [if female] $\times 1.159$ [if black] |

<sup>a</sup> GFR estimated with Rules equation of 2006.

<sup>b</sup> GFR estimated by the Modification of Diet in Renal Disease equation

<sup>c</sup> GFR estimated by the Chronic Kidney Disease Epidemiology equation

$S_{cr}$  is serum creatinine,  $k$  is 0.7 for females and 0.9 for males,  $\alpha$  is -0.329 for females and -0.411 for males,

min indicates the minimum of  $Scr/k$ , and max indicates the maximum of  $Scr/k$

**Table S2.** Study population characteristics of included persons in the RENIS-T6 cohort compared to those not included (but eligible) from the sixth Tromsø Study (Tromsø 6)<sup>a</sup>

|                                                         | Included<br>(n=1627)  | Not included<br>(n=1198) | P-value <sup>b</sup> |
|---------------------------------------------------------|-----------------------|--------------------------|----------------------|
| Male sex (%)                                            | 49.2 <sup>c</sup>     | 43.7 <sup>c</sup>        |                      |
| Age (years)                                             | 56.9 (56.7 - 57.1)    | 57.0 (56.8 - 57.2)       | 0.004                |
| Height (cm)                                             | 170.6 (170.2 - 171.1) | 170.1 (169.6 - 170.7)    | 0.36                 |
| Weight (kg)                                             | 78.7 (78.0 - 79.4)    | 76.9 (76.0 - 77.7)       | 0.02                 |
| Body mass index (kg/m <sup>2</sup> )                    | 26.9 (26.7 - 27.1)    | 26.5 (26.2 - 26.7)       | 0.002                |
| Body surface area (m <sup>2</sup> )                     | 1.90 (1.89 - 1.91)    | 1.88 (1.87 - 1.89)       | 0.09                 |
| Estimated GFR <sup>d</sup> (ml/min/1.73m <sup>2</sup> ) | 91.8 (91.1 - 92.6)    | 90.4 (89.5 - 91.3)       | 0.04                 |
| Albumin-creatinine ratio <sup>e</sup> (mg/g)            | 3.31 (1.88 - 6.10)    | 3.40 (1.84 - 6.30)       | 0.42                 |
| Systolic BP (mmHg)                                      | 134.5 (133.5 - 135.5) | 133.3 (132.2 - 134.4)    | 0.08                 |
| Diastolic BP (mmHg)                                     | 79.7 (79.1 - 80.2)    | 78.5 (77.9 - 79.1)       | 0.02                 |
| LDL cholesterol (mg/dL)                                 | 145.6 (143.9 - 147.2) | 147.9 (145.9 - 150.0)    | 0.05                 |
| HDL cholesterol (mg/dL)                                 | 59.9 (59.0 - 60.7)    | 61.2 (60.2 - 62.2)       | 0.33                 |
| Triglycerides <sup>e</sup> (mg/dL)                      | 115.2 (79.7 - 168.3)  | 115.1 (79.7 - 159.4)     | 0.20                 |
| Current daily smoking (%)                               | 21.1 (19.0 - 23.0)    | 21.9 (20.0 - 23.0)       | 0.60                 |
| Leisure-time physical exercise <sup>f</sup>             |                       |                          | 0.10                 |
| Never exercise (%)                                      | 3.6 (2.8 - 5.1)       | 5.1 (3.7 - 7.0)          |                      |
| Low intensity exercise <sup>g</sup> (%)                 | 39.6 (38.0 - 44.0)    | 38.8 (35.4 - 42.3)       |                      |
| High intensity exercise <sup>h</sup> (%)                | 53.0 (52.0 - 58.0)    | 50.4 (46.8 - 53.9)       |                      |

Values are mean (95% CI) or median (IQR), weighted according to the age- and sex-stratification of RENIS-T6.

<sup>a</sup> Study population characteristics measured at Tromsø 6 (non-fasting and ahead of RENIS-T6).

<sup>b</sup> P-value for difference between included versus not included persons in age- and sex-adjusted multiple linear regression for mean values, quantile regression for median values and by chi-square in case of categorical variables.

<sup>c</sup> The sex difference between included versus not included persons is because participants were included stratified by gender.

<sup>d</sup> GFR estimated with the recalibrated four-variable Modification of Diet in Renal Disease Study equation.

<sup>e</sup> Values are the median (IQR)

<sup>f</sup> 60 and 65 persons with missing information on exercise for those included and those not included, respectively.

<sup>g</sup> Easy exercise; without becoming breathless or sweaty.

<sup>h</sup> Hard exercise; becoming breathless and sweaty, or exhausted.
